# Supplementary material for: Melatonin improves bioreductant capacity and silver nanoparticles synthesis using Catharanthus roseus leaves
Source: Royal Society of Chemistry journal article supplement (doi:10.1039/c5ra01848j), 2015-01-01
Supplement: c5ra01848j1.pdf [file c5ra01848j1.pdf]

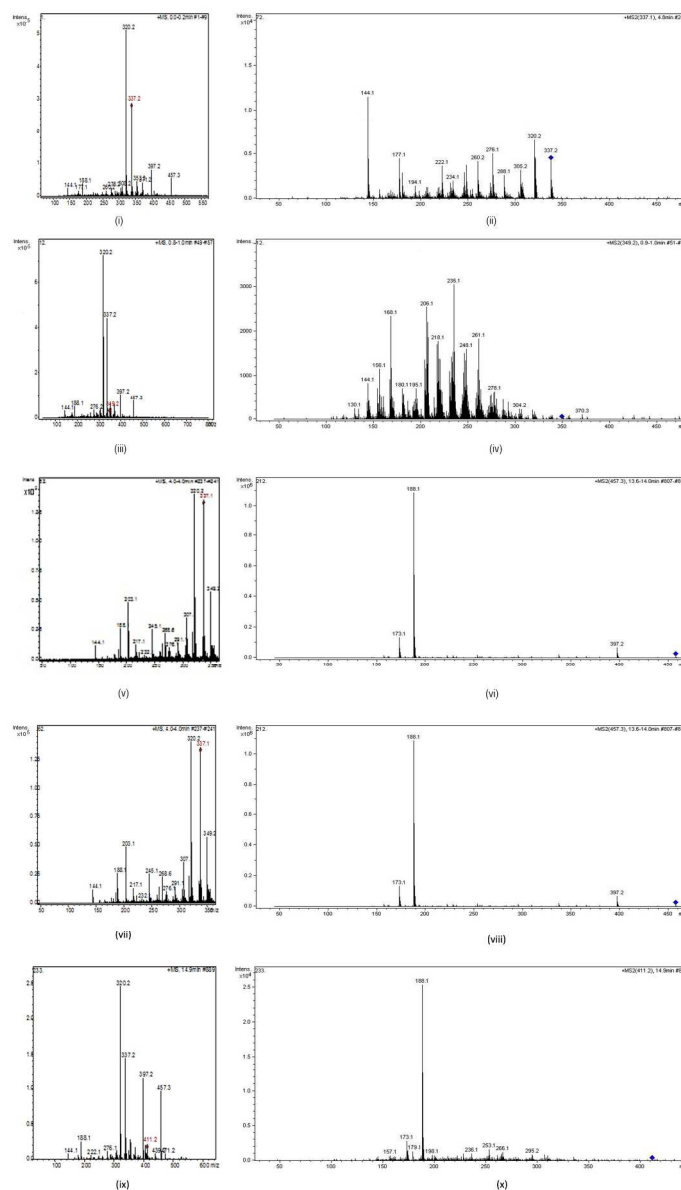

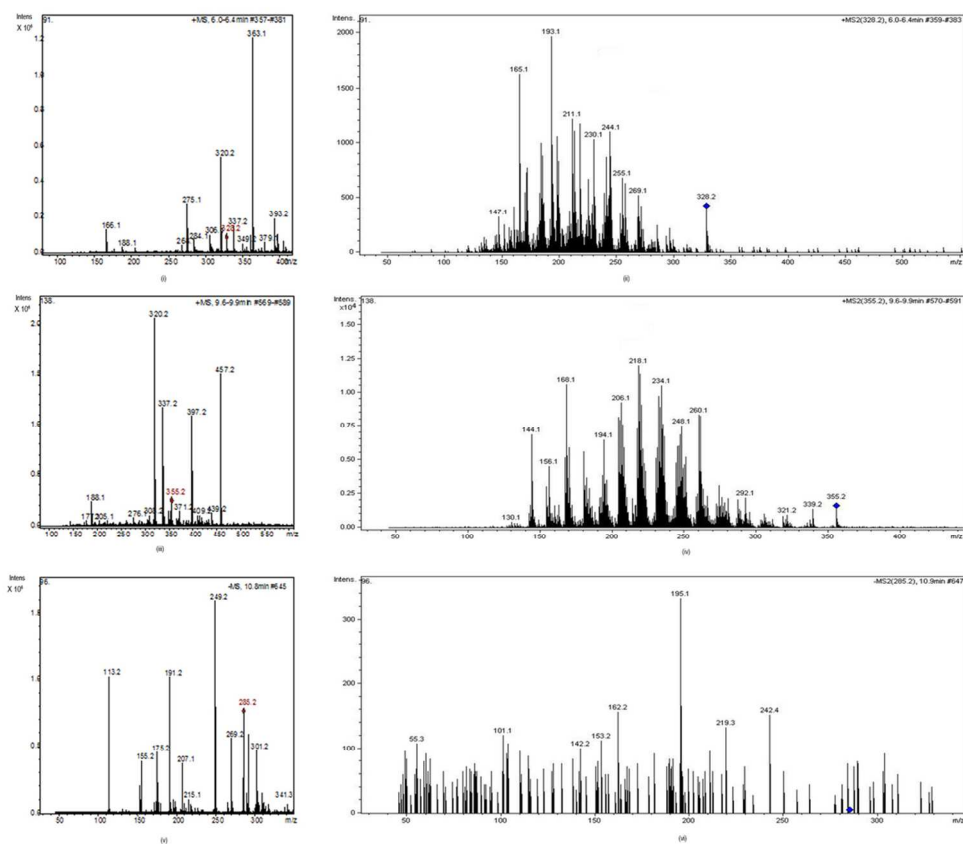

Supplementary Figure 2. MS and MS/MS spectra of compounds unique to Mel treated (300  $\mu$ M) *C. roseus* leaves, viz., 6-acetyl morphine (i,ii), Rauwolscine (iii,iv) and Fisetin (v,vi)
